# Supplementary material for: Novel Janus membrane with unprecedented osmosis transport performance
Source: Royal Society of Chemistry journal article supplement (doi:10.1039/c8ta08541b), 2018-12-01
Supplement: c8ta08541b1.pdf [file c8ta08541b1.pdf]

## Supporting Information

### Novel Janus Membrane with Unprecedented Osmosis Transport Performance

Shenghua Zhou, Zhu Xiong, Fu Liu\*, Haibo Lin, Jianqiang Wang, Tiantian Li, Qiu Han and Qile Fang

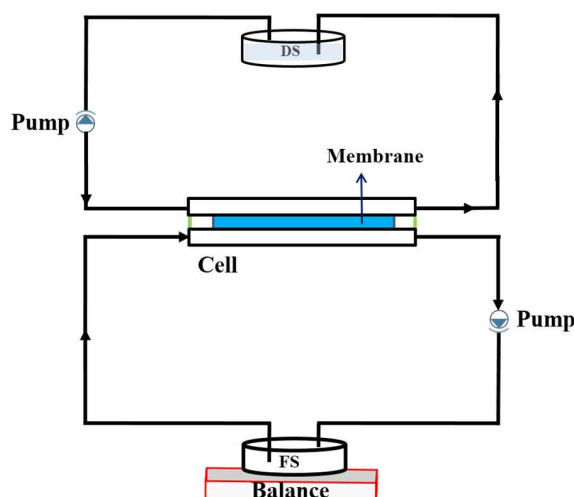

**Figure S1.** Schematic diagram of FO system

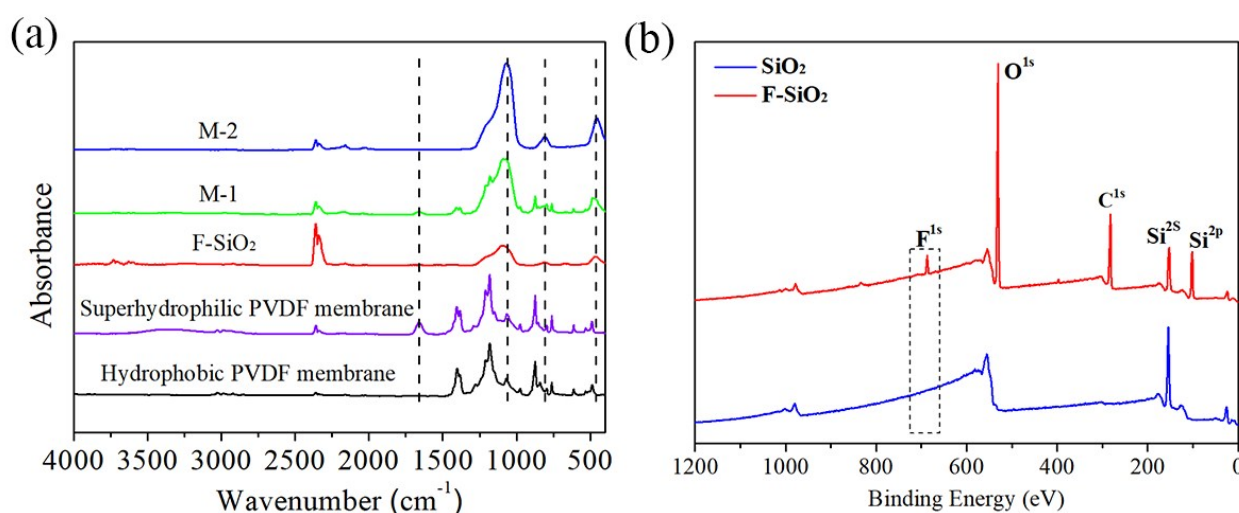

**Figure S2.** (a) FT-IR characterization of the pristine PVDF membrane, superhydrophilic PVDF membrane, Janus membrane M1, M2 with excess F-SiO<sub>2</sub> coating and F-SiO<sub>2</sub>, respectively. (b) XPS characterization for pristine SiO<sub>2</sub> and F-SiO<sub>2</sub>.

**Figure S2 (a)** gives the FT-IR spectrum of the membrane. The absorbance of characteristic peaks at 462

$\text{cm}^{-1}$  and  $806\text{ cm}^{-1}$  are attributed to Si-O stretching vibrations while distinct characteristic peak appeared at  $1065\text{ cm}^{-1}$  belongs to stretching vibrations of Si-O-Si. The characteristic peaks at  $1663\text{ cm}^{-1}$  are attributed to C=O existed in NVP. Figure S2b shows XPS characterization of pristine  $\text{SiO}_2$  and F- $\text{SiO}_2$ . An obvious peak at 686 eV is attributed to  $\text{F}^{1s}$ , which prove the successful grafting of FOTS onto the surface of  $\text{SiO}_2$  nanoparticles.

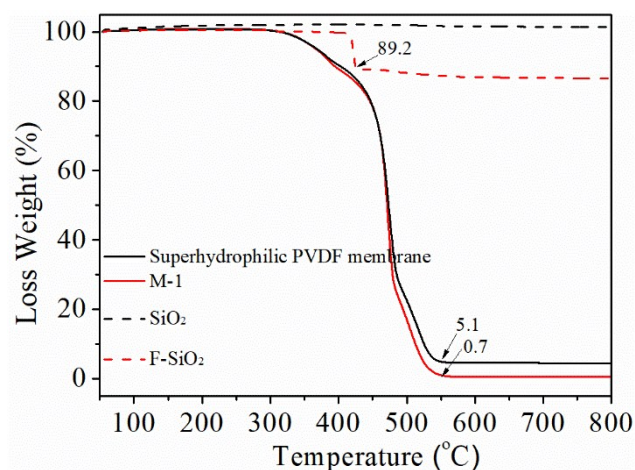

**Figure S3.** TGA curves for calculating the loading of F- $\text{SiO}_2$  on superhydrophilic PVDF membrane surface

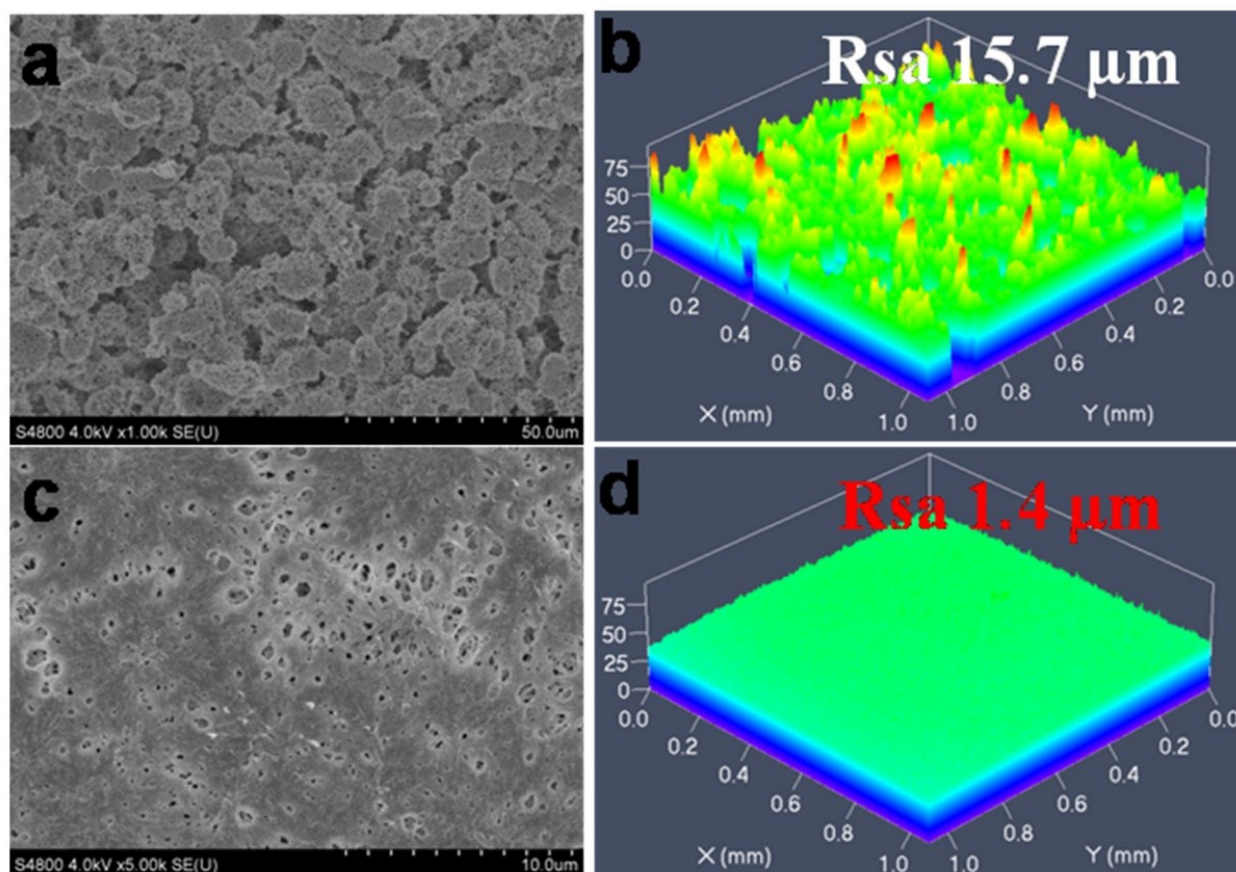

**Figure S4.** (a, b) Micro-structure and roughness of Janus-A side; (c, d) The micro-structure and roughness of Janus-B side

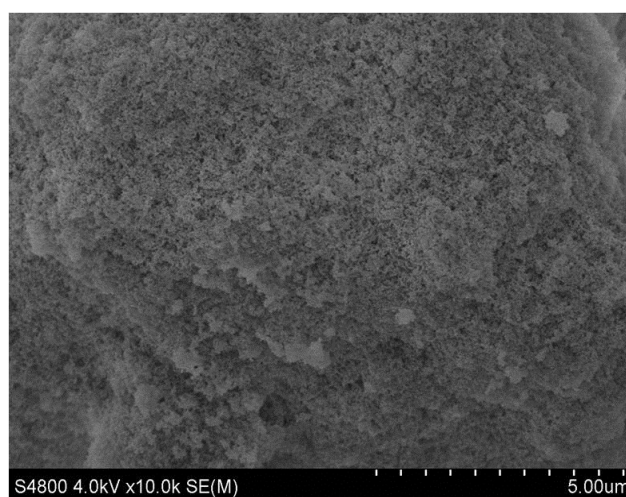

**Figure S5.** SEM image of Janus M-2 membrane with 2% F-SiO<sub>2</sub> loading

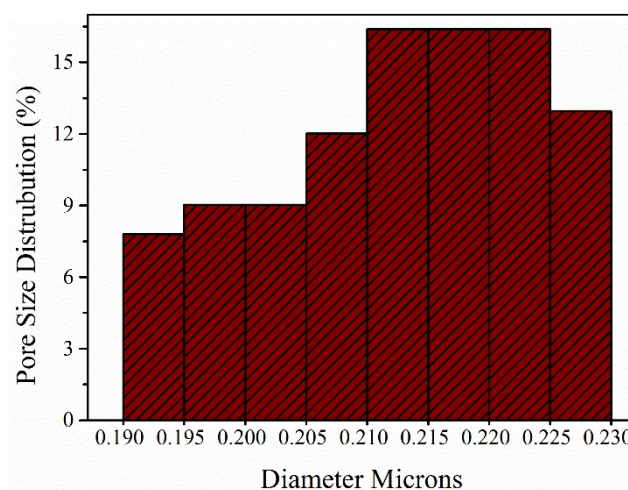

**Figure S6.** Pore size distribution of our Janus membrane.

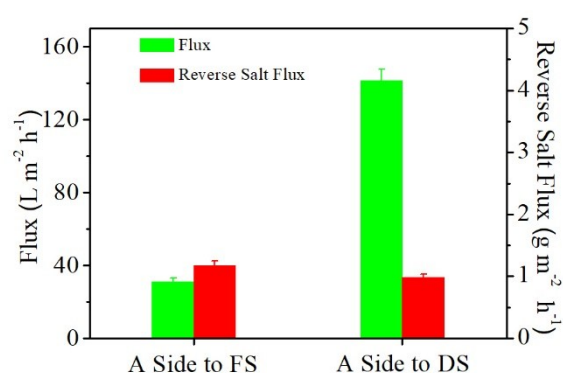

**Figure S7.** Water flux and reserve salt flux with superhydrophobic A side facing to FS (FO mode) and DS (PRO mode) respectively.

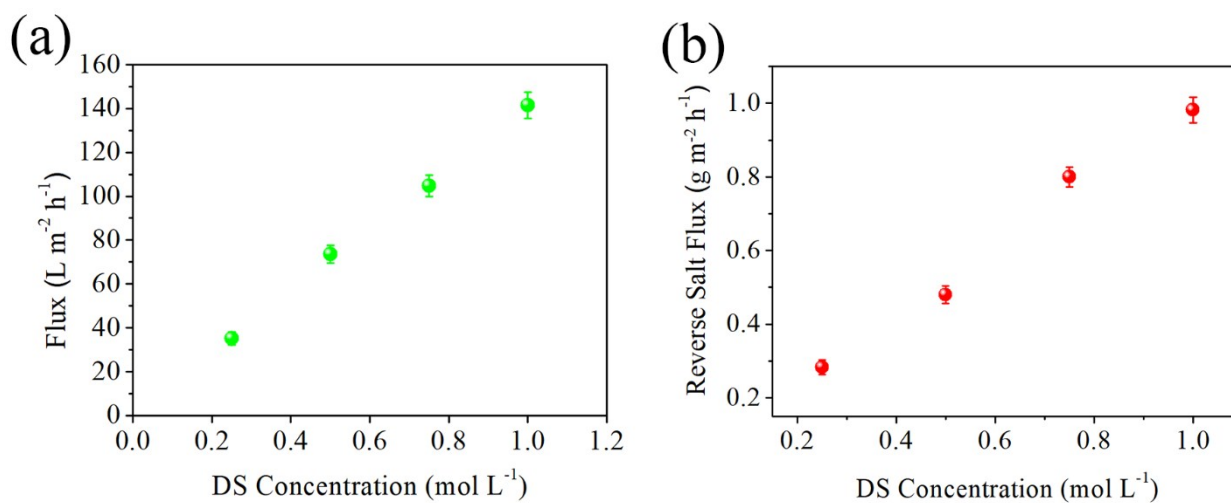

**Figure S8.** Water flux and reserve salt flux as a function of draw solution concentration

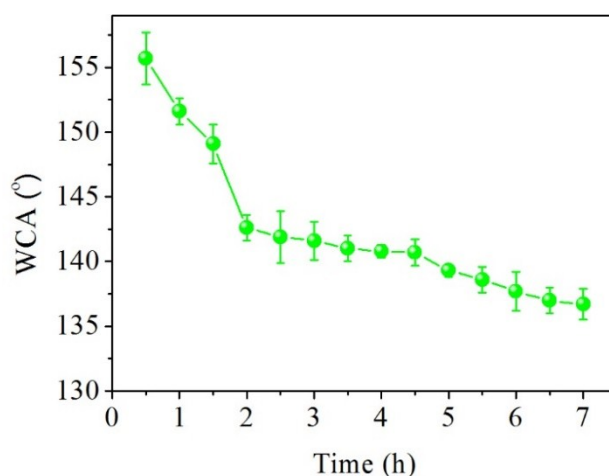

**Figure S9.** WCA as a function of time

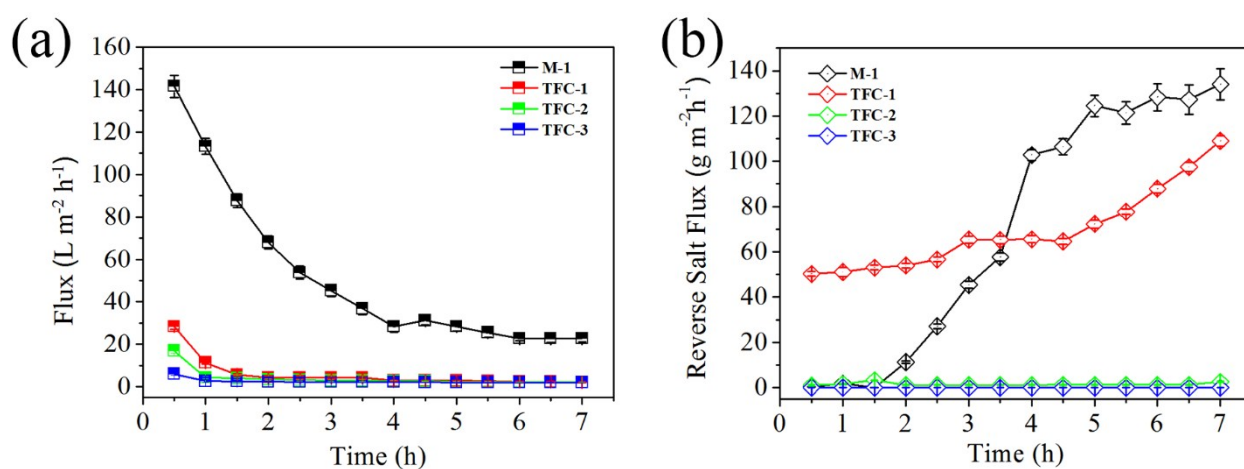

**Figure S10.** Water flux and reserve salt flux change as a function of time.

**Table S1.** The structure of three different membranes M-1, M-2, M-3.

| Membrane | A Side                    | B Side                | Thickness ( $\mu\text{m}$ ) |
|----------|---------------------------|-----------------------|-----------------------------|
| M-1      | F-SiO <sub>2</sub>        | Superhydrophilic PVDF | 220                         |
| M-2      | Excess F-SiO <sub>2</sub> | superhydrophobic PVDF | 220                         |
| M-3      | F-SiO <sub>2</sub>        | Superhydrophilic PVDF | 220                         |
